# Supplementary material for: Hepatocyte PRMT1 protects from alcohol induced liver injury by modulating oxidative stress responses
Source: PubMed Central journal article supplement (PMC6591482; doi:10.1038/s41598-019-45585-2), 2019-06-24
Supplement: 41598_2019_45585_MOESM1_ESM.pdf [file 41598_2019_45585_MOESM1_ESM.pdf]

Supplemental material

Hepatocyte PRMT1 protects from alcohol induced liver injury by modulating oxidative stress responses

Jie Zhao<sup>1</sup>, Abby Adams<sup>1,2</sup>, Steven A. Weinman<sup>1,2</sup> and Irina Tikhanovich<sup>1\*</sup>

Figure 3C

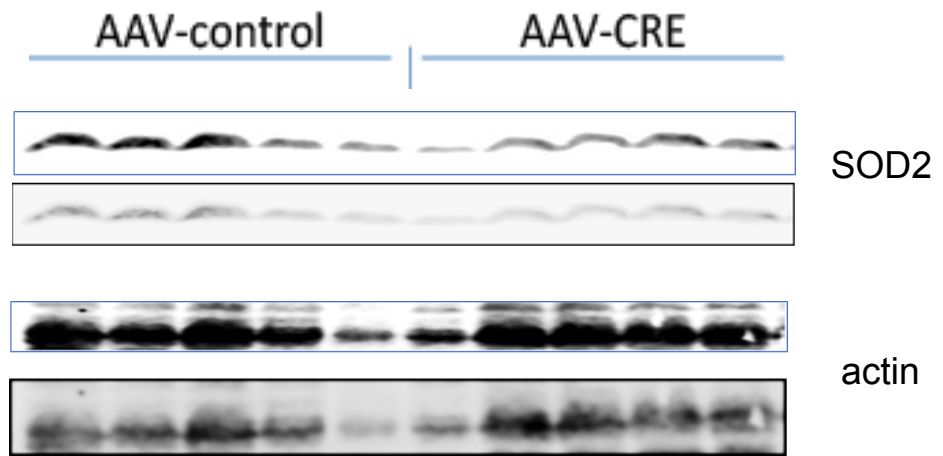

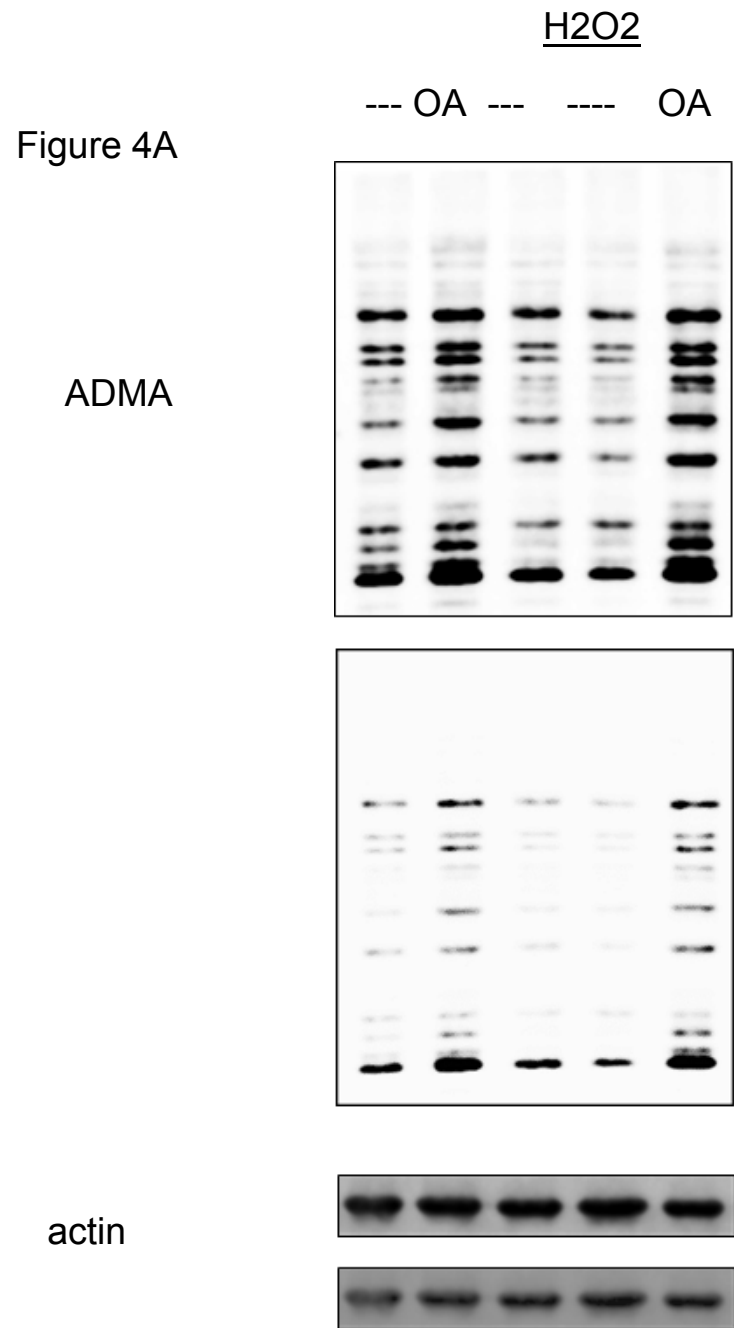

Figure 4D

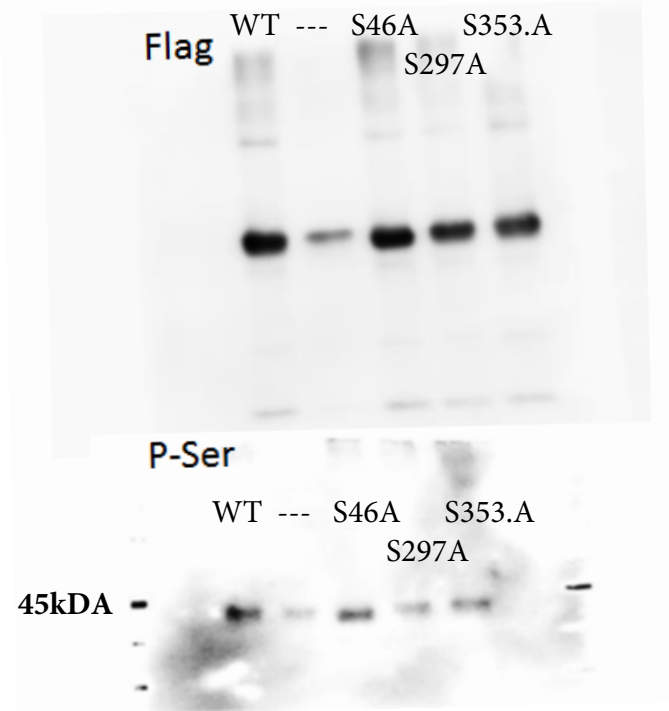

Figure 4F

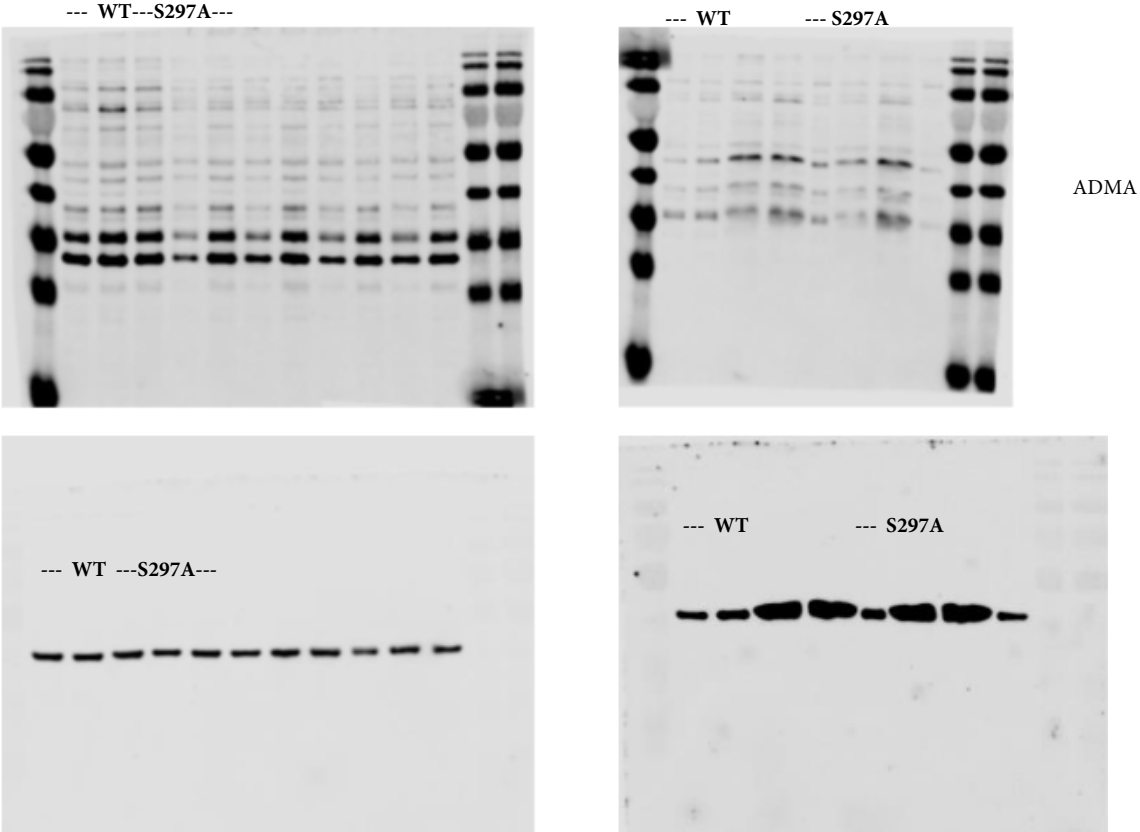

Figure 6E

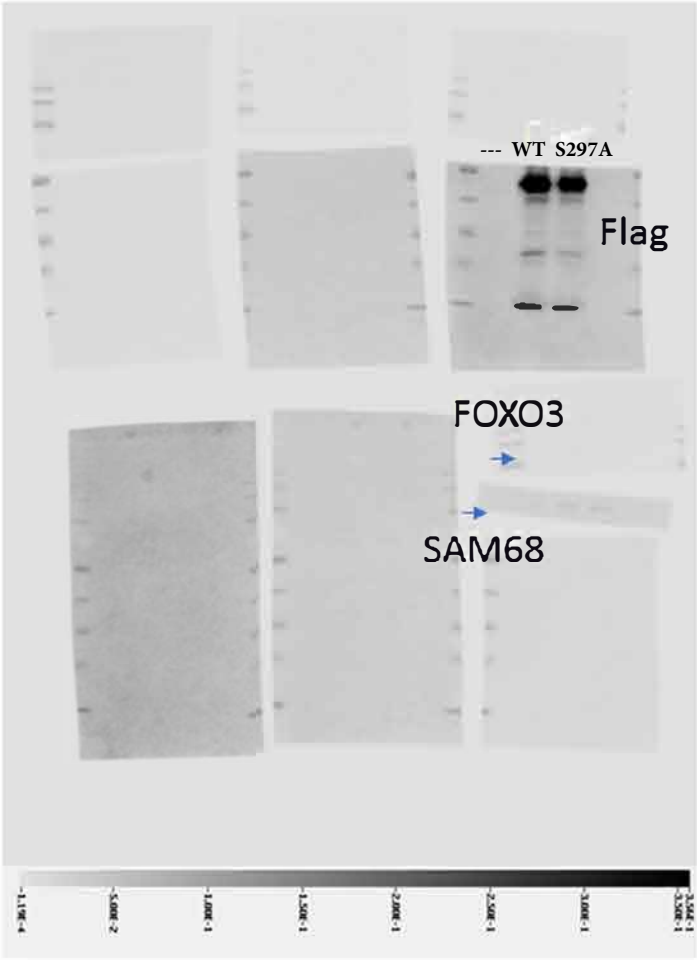

Higher contrast

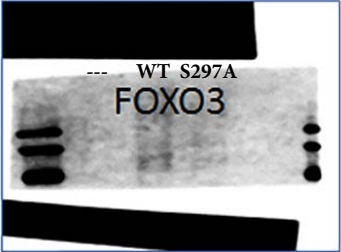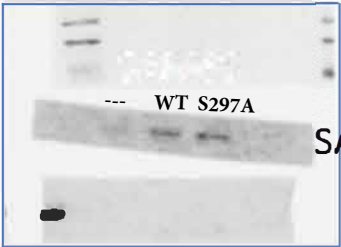

SAM68
